# Supplementary material for: Anti-Mycobacterium tuberculosis Terpenoids from Resina Commiphora
Source: PubMed Central journal article supplement (PMC6515556; doi:10.3390/molecules24081475), 2019-04-15
Supplement: molecules-24-01475-s001.pdf [file molecules-24-01475-s001.pdf]

# Supplementary Materials

## *Anti-Mycobacterium tuberculosis* Terpenoids from *Resina Commiphora*

Chuan-Zhi Zhu <sup>1,2,†</sup>, Bin-Yuan Hu <sup>2,†</sup>, Jia-Wang Liu <sup>2,†</sup>, Yi Cai <sup>2</sup>, Xin-Chun Chen <sup>2</sup>, Da-Peng Qin <sup>2</sup>, Yong-Xian Cheng <sup>2,\*</sup> and Zong-De Zhang <sup>1\*</sup>

- 1 Laboratory of Molecular Biology, Beijing Tuberculosis and Thoracic Tumor Research Institute, Beijing 101149, China; 15910404956@163.com;
- 2 Guangdong Key Laboratory for Genome Stability & Disease Prevention, School of Pharmaceutical Sciences, School of Basic Medicine, Shenzhen University Health Science Center, Shenzhen 518060, China; HuBinyuan2018@163.com (B.-Y.H.); liujiawang@imm.ac.cn (J.-W.L.); caiyi0113@gmail.com (Y.C.); chenxinchun@szu.edu.cn (X.-C.C.); tqindp@szu.edu.cn (D.-P.Q.)

\* Correspondence: yxcheng@szu.edu.cn (Y.-X.C.); zzd417@163.com (Z.-D.Z.); Tel./Fax: +86-0755-26902073 (Y.-X.C.); +86-10-89509364 (Z.-D.Z.)

† These authors contributed equally to this work.

Received: 5 March 2019; Accepted: 12 April 2019; Published: 15 April 2019

## **Table of Contents**

- 1. Figures S1–S7 NMR spectra and HRESIMS of 1**
- 2. Figures S8–S14 NMR spectra and HRESIMS of 2**
- 3. Figures S15–S21 NMR spectra and HRESIMS of 2**
- 4. Figures S2–S28 NMR spectra and HRESIMS of 2**

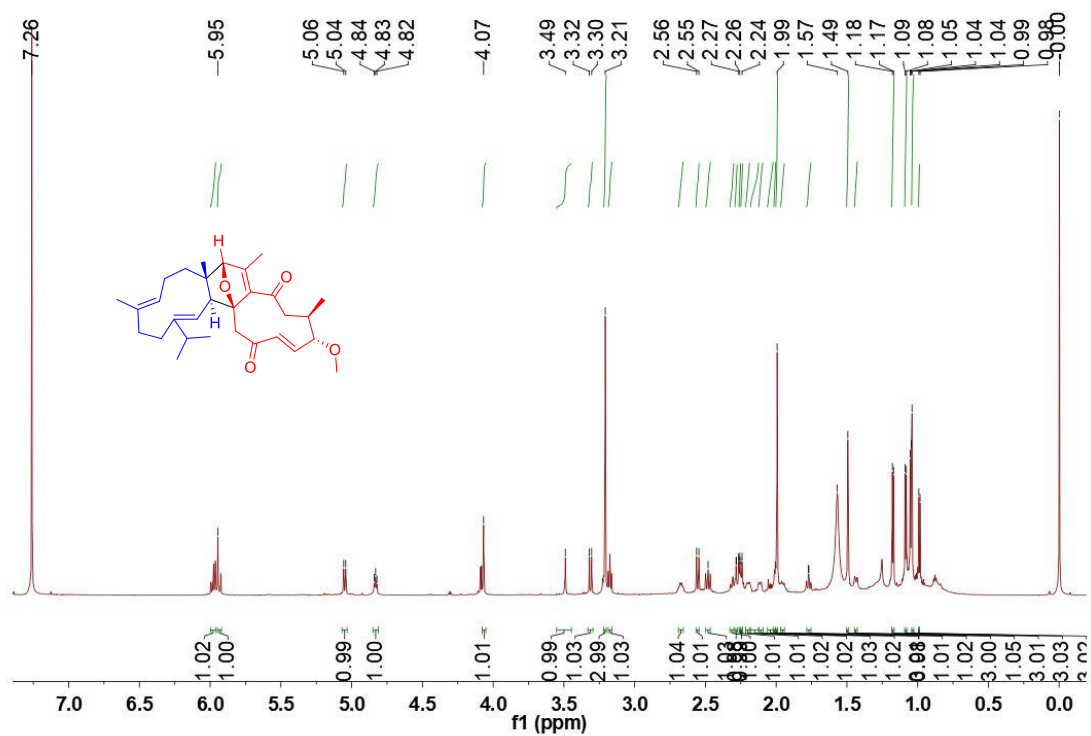

Figure S1.  $^1\text{H}$  NMR spectrum of **1** in  $\text{CDCl}_3$ .

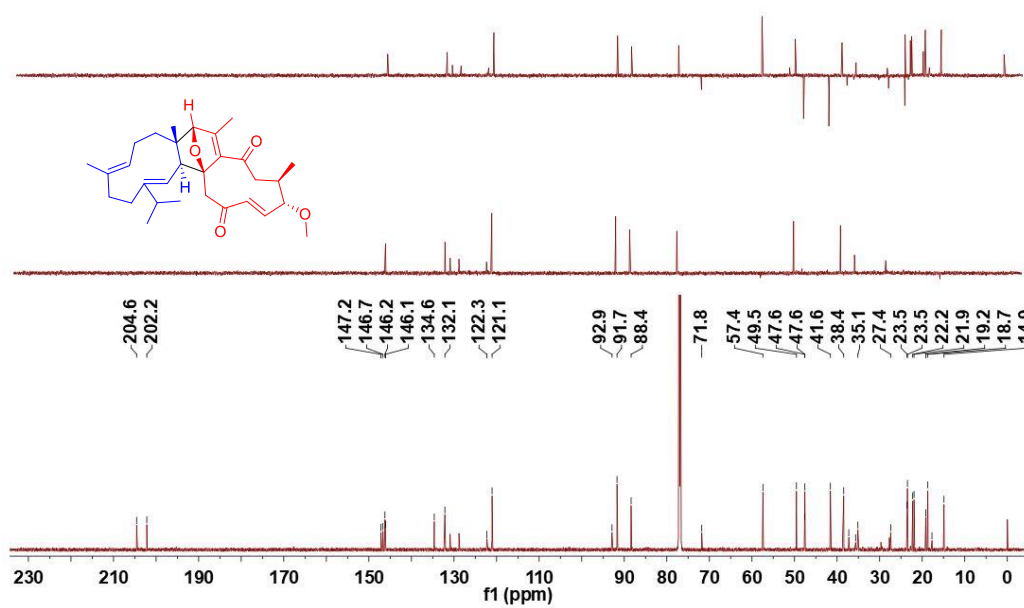

Figure S2.  $^{13}\text{C}$  NMR and DEPT spectra of **1** in  $\text{CDCl}_3$ .

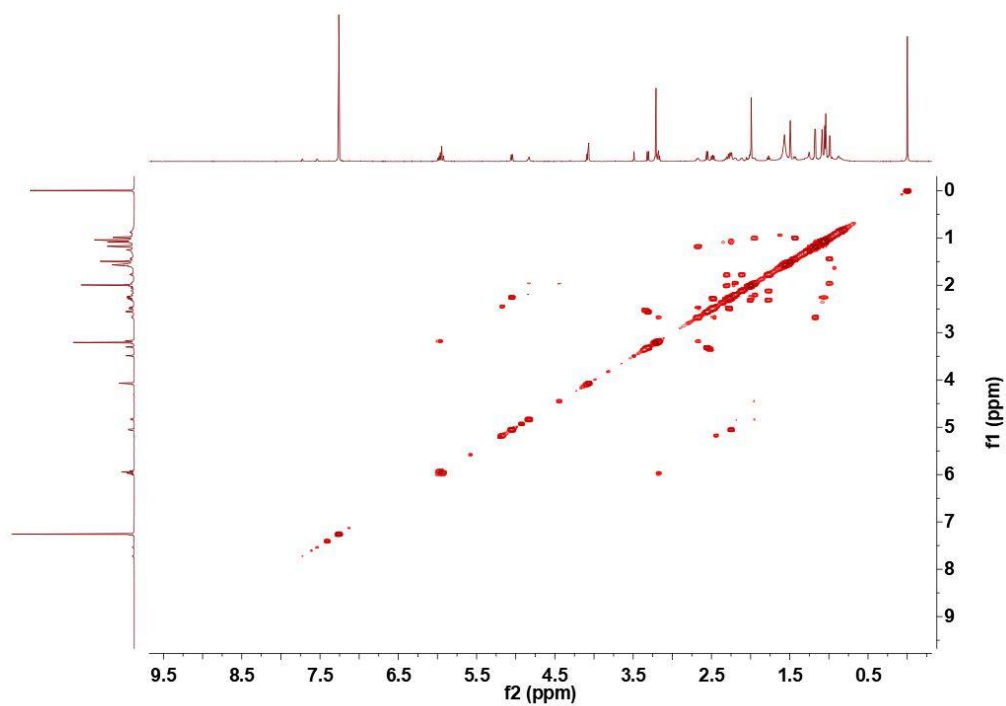

**Figure S3.**  $^1\text{H}$ - $^1\text{H}$  COSY spectrum of **1** in  $\text{CDCl}_3$ .

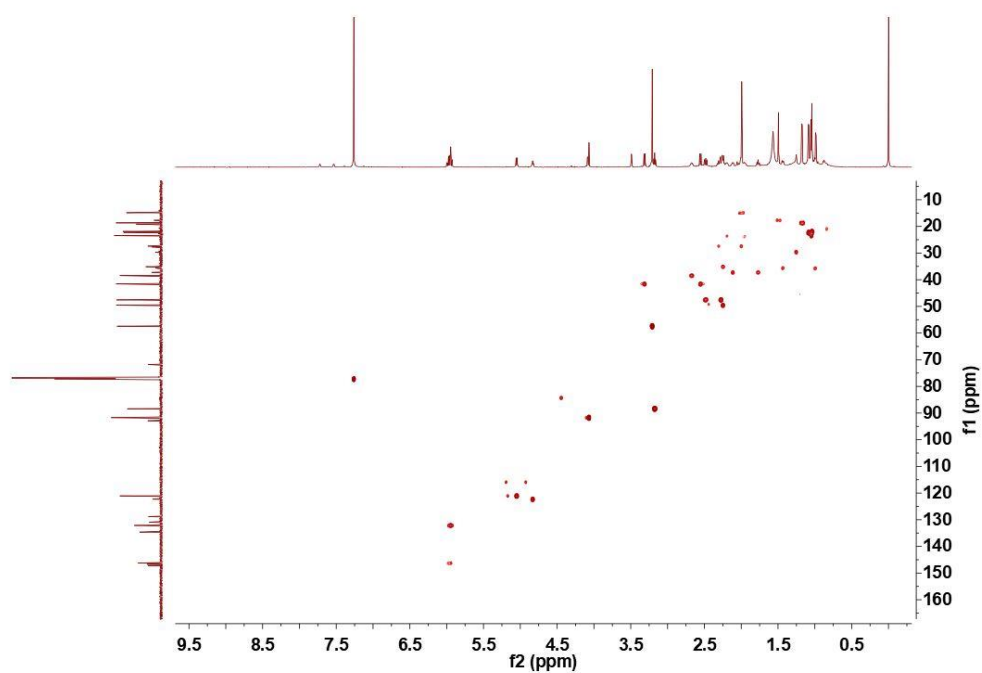

**Figure S4.** HSQC Spectrum of **1** in  $\text{CDCl}_3$ .

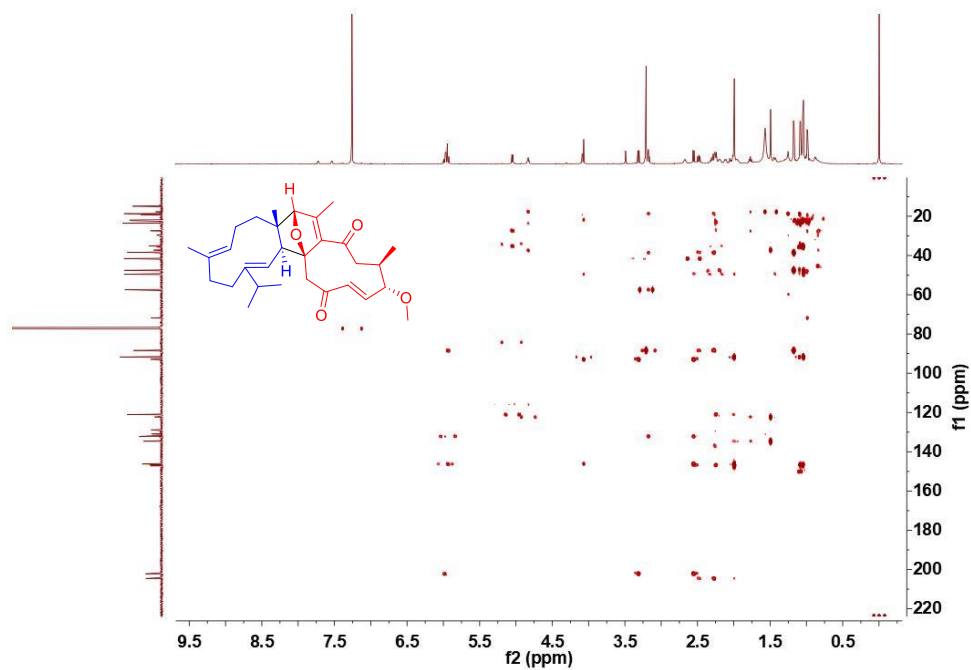

Figure S5. HMBC spectrum of **1** in CDCl<sub>3</sub>.

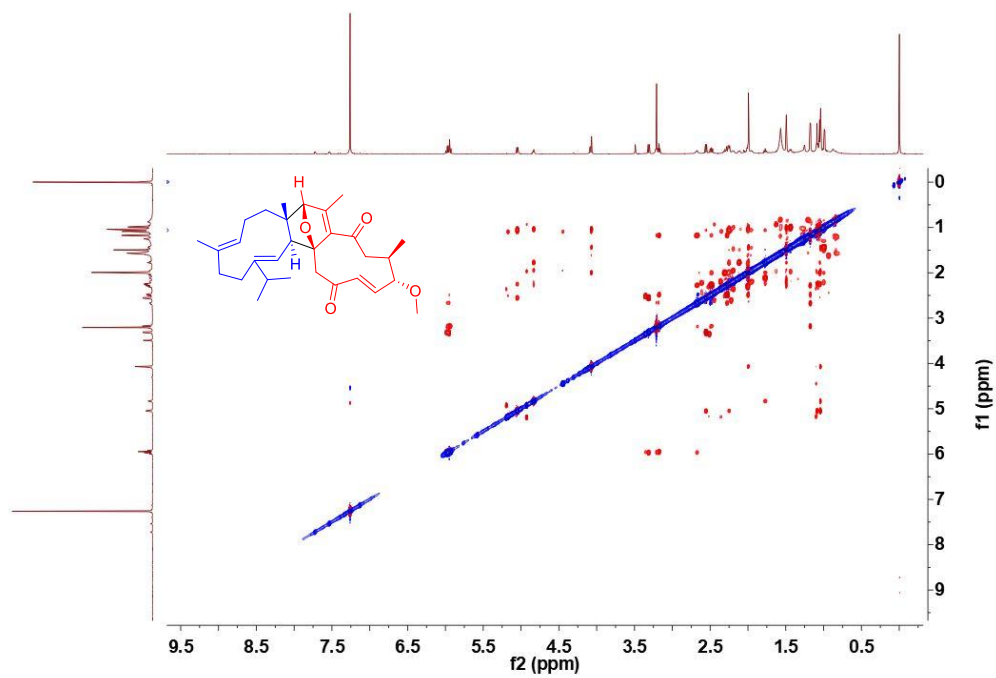

Figure S6. ROESY spectrum of **1** in CDCl<sub>3</sub>.

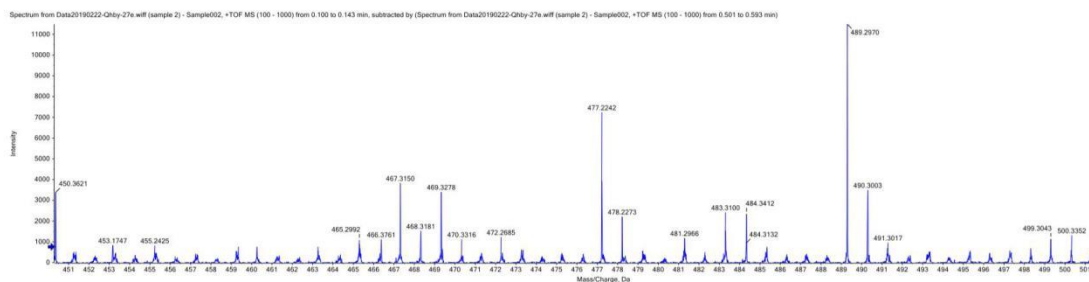

[M+H]<sup>+</sup> m/z 467.3150

| Hit | Formula                                        | m/z      | RDB  | ppm  |
|-----|------------------------------------------------|----------|------|------|
| 1   | C <sub>30</sub> H <sub>43</sub> O <sub>4</sub> | 467.3156 | 10.0 | -1.3 |

Elements from ~ to C<sub>60</sub>H<sub>120</sub>O<sub>6</sub>

Mass tolerance 5 ppm

**Figure S7.** HRESIMS of **1**.

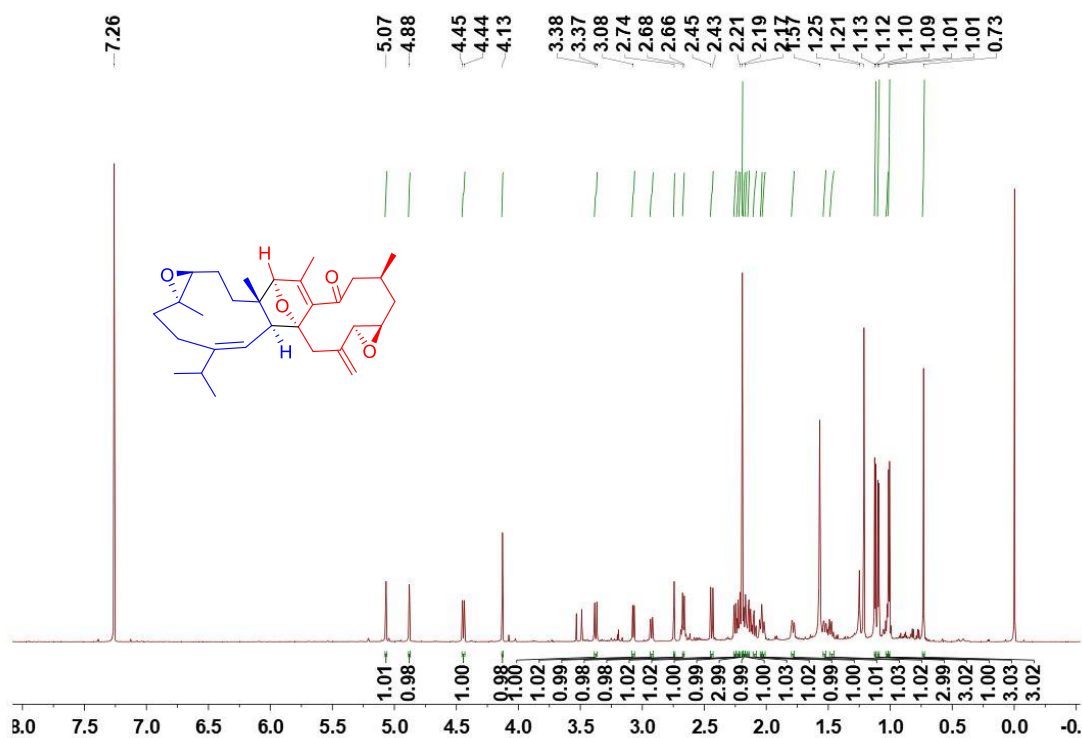

**Figure S8.** <sup>1</sup>H NMR spectrum of **2** in CDCl<sub>3</sub>.

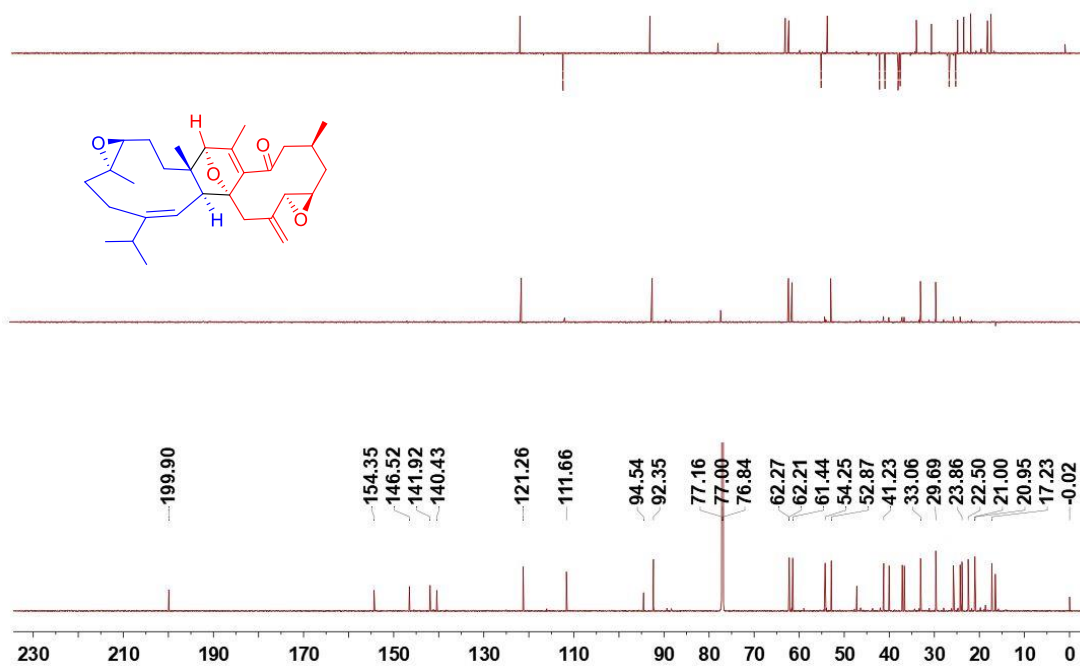

**Figure S9.**  $^{13}\text{C}$  NMR and DEPT spectra of **2** in  $\text{CDCl}_3$ .

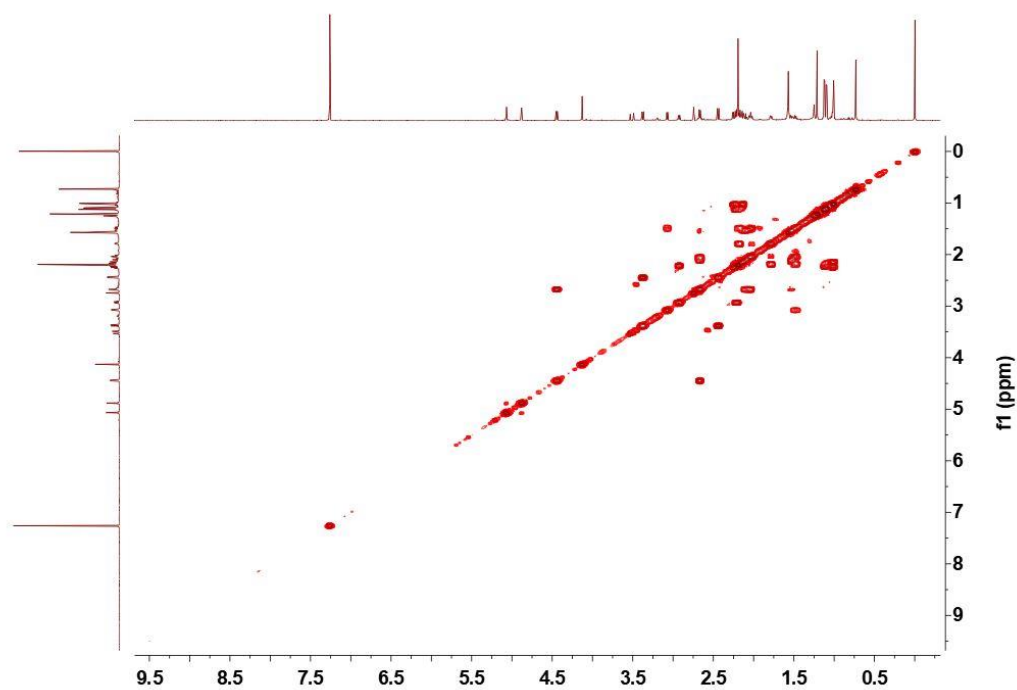

**Figure S10.**  $^1\text{H}$ - $^1\text{H}$  COSY spectrum of **2** in  $\text{CDCl}_3$ .

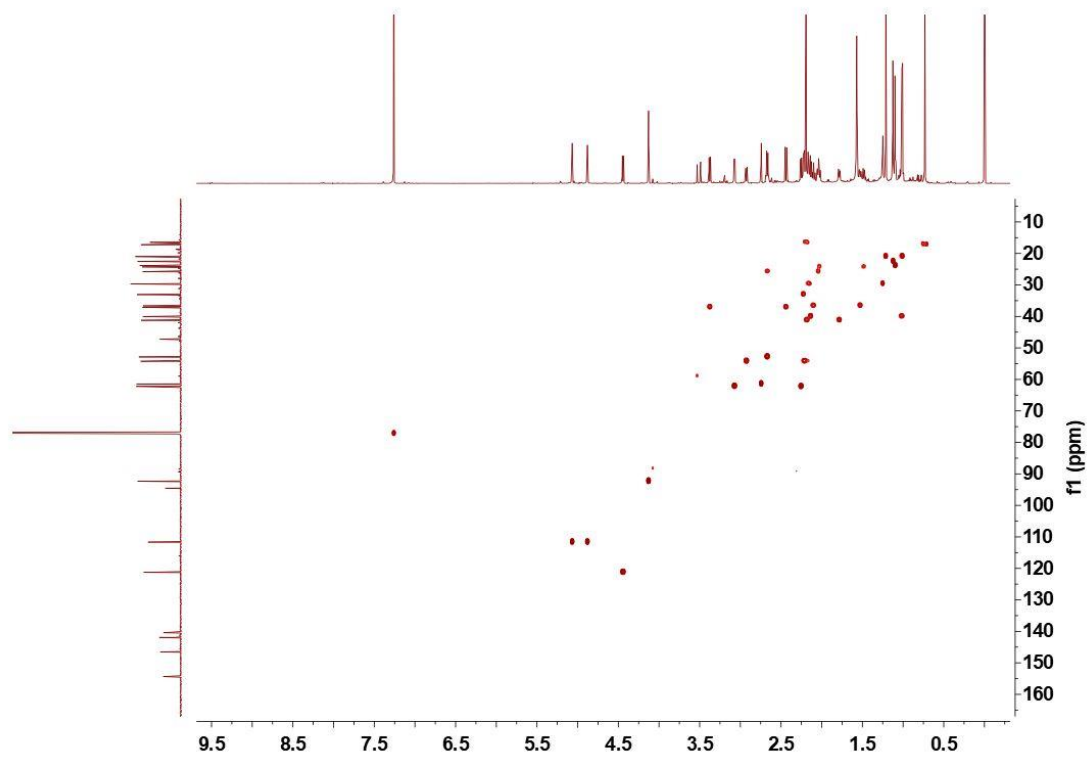

Figure S11. HSQC Spectrum of **2** in  $\text{CDCl}_3$ .

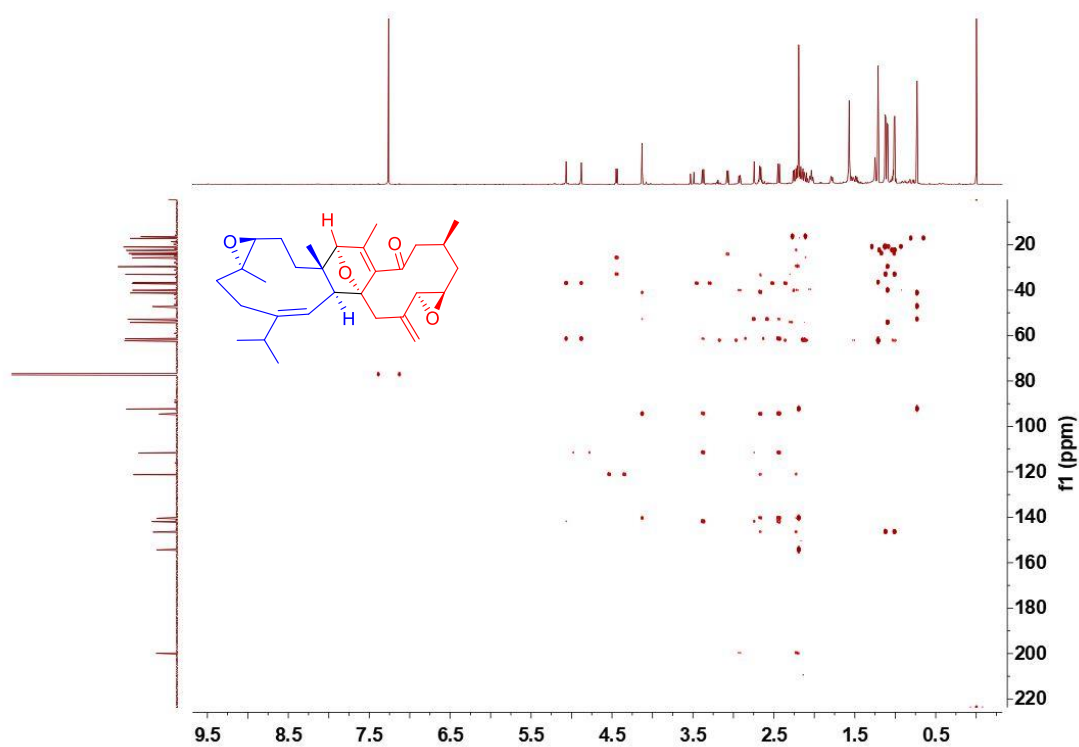

Figure S12. HMBC spectrum of **2** in  $\text{CDCl}_3$ .



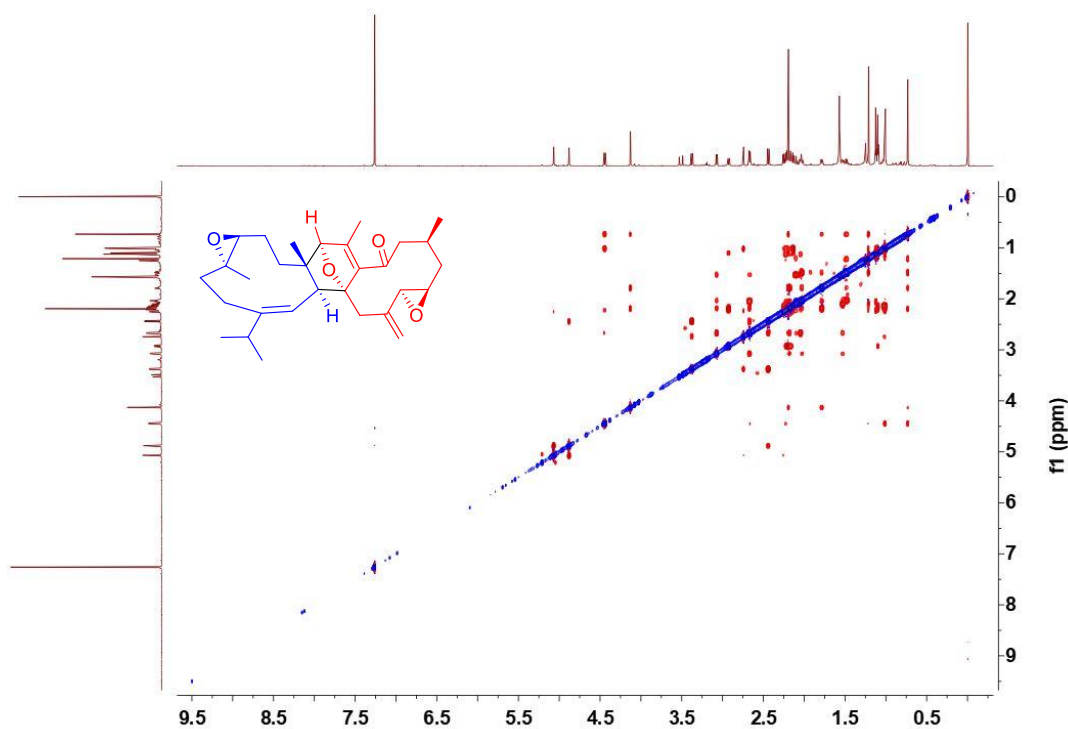

Figure S13. ROESY spectrum of 2 in CDCl<sub>3</sub>.

#### Qualitative Analysis Report

|                        |                             |               |                      |
|------------------------|-----------------------------|---------------|----------------------|
| Data Filename          | 170920ESIA15.d              | Sample Name   | qjw-58d              |
| Sample Type            | Sample                      | Position      |                      |
| Instrument Name        | Agilent G6230 TOF MS        | User Name     | KIB                  |
| Acq Method             | ESL.m                       | Acquired Time | 9/19/2017 6:28:58 PM |
| IRM Calibration Status | Success                     | DA Method     | ESL.m                |
| Comment                |                             |               |                      |
| Sample Group           |                             | Info.         |                      |
| Acquisition SW         | 6200 series TOF/6500 series |               |                      |
| Version                | Q-TOF B.05.01 (B5125.2)     |               |                      |

#### User Spectra

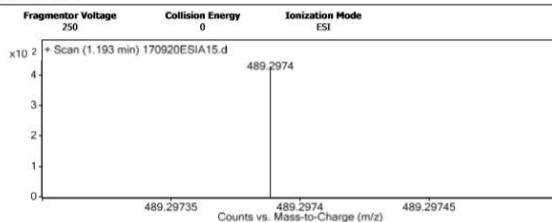

| m/z      | z | Abund    |
|----------|---|----------|
| 121.0509 | 1 | 9492.1   |
| 256.2626 | 1 | 8474.39  |
| 274.2738 | 1 | 15405.78 |
| 318.2998 | 1 | 14130.2  |
| 362.3261 | 1 | 4403.11  |
| 384.3077 | 1 | 3165.42  |
| 437.1929 | 1 | 4847.29  |
| 521.3206 | 1 | 2700.71  |
| 922.0098 | 1 | 44952.27 |
| 923.01   | 1 | 5919.36  |

| Element | Min | Max |
|---------|-----|-----|
| C       | 0   | 200 |
| H       | 0   | 400 |
| O       | 4   | 10  |
| Na      | 1   | 1   |

| Formula       | CalculatedMass | Mz       | Diff.(mDa) | Diff.(ppm) | DBE |
|---------------|----------------|----------|------------|------------|-----|
| C30 H42 Na O4 | 489.2981       | 489.2974 | 0.7        | 1.4        | 9.5 |

— End Of Report —

Figure S14. HRESIMS of 2.

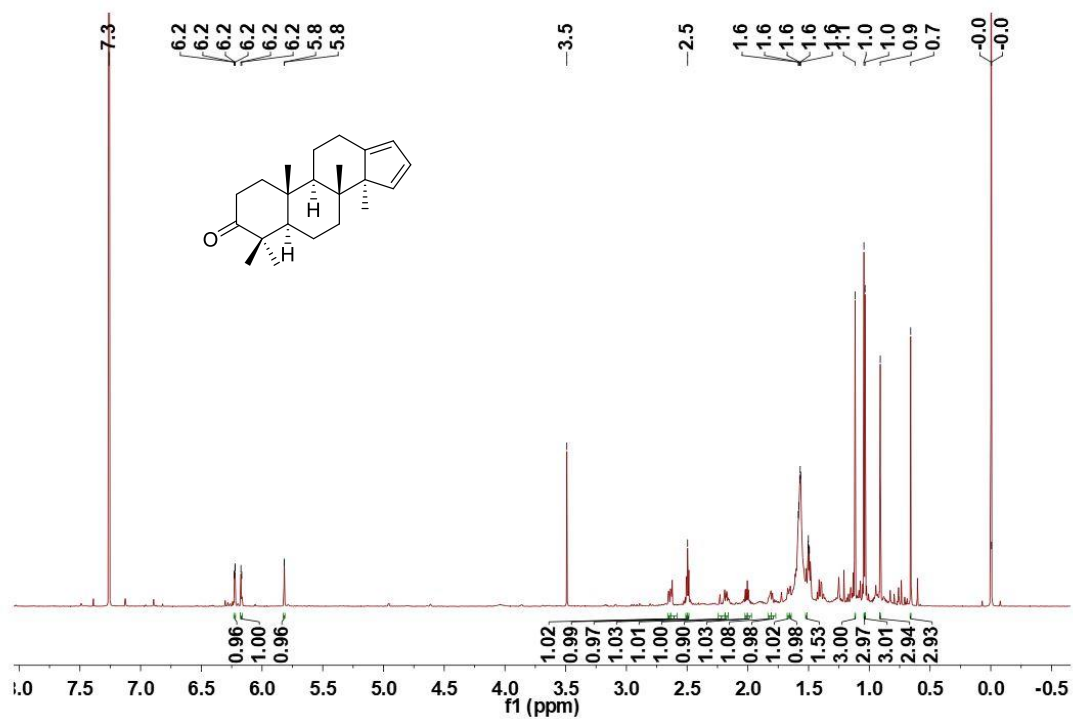

Figure Figure S15.  $^1\text{H}$  NMR spectrum of 3 in  $\text{CDCl}_3$ .

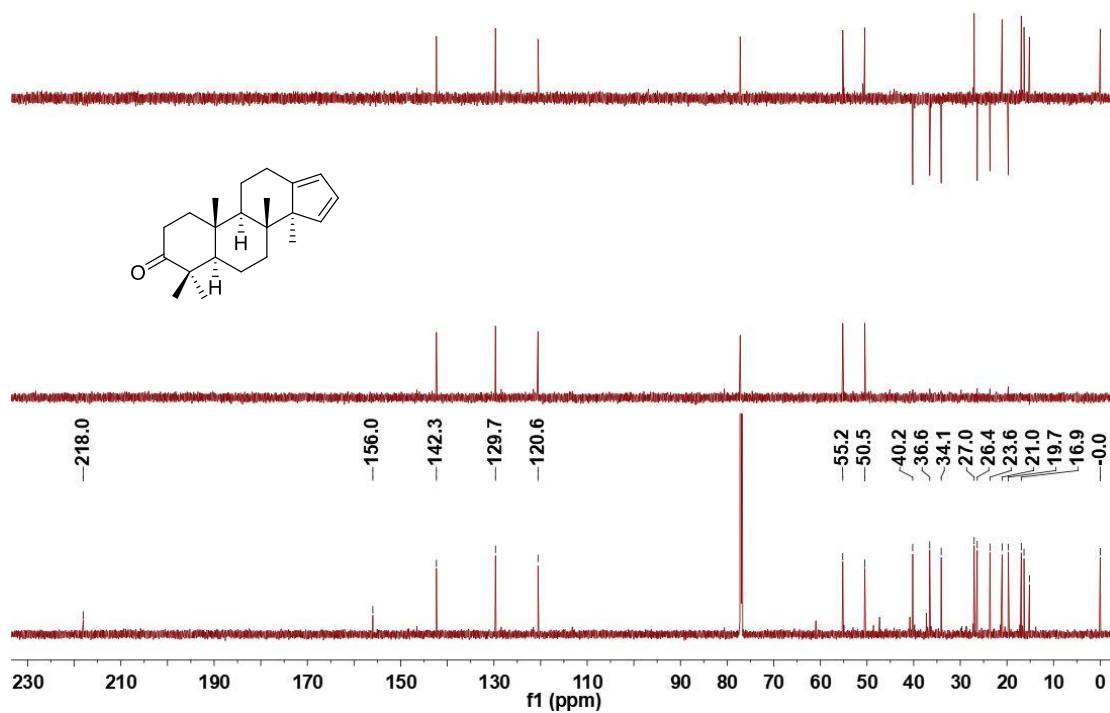

Figure S16.  $^{13}\text{C}$  NMR and DEPT spectra of 3 in  $\text{CDCl}_3$ .

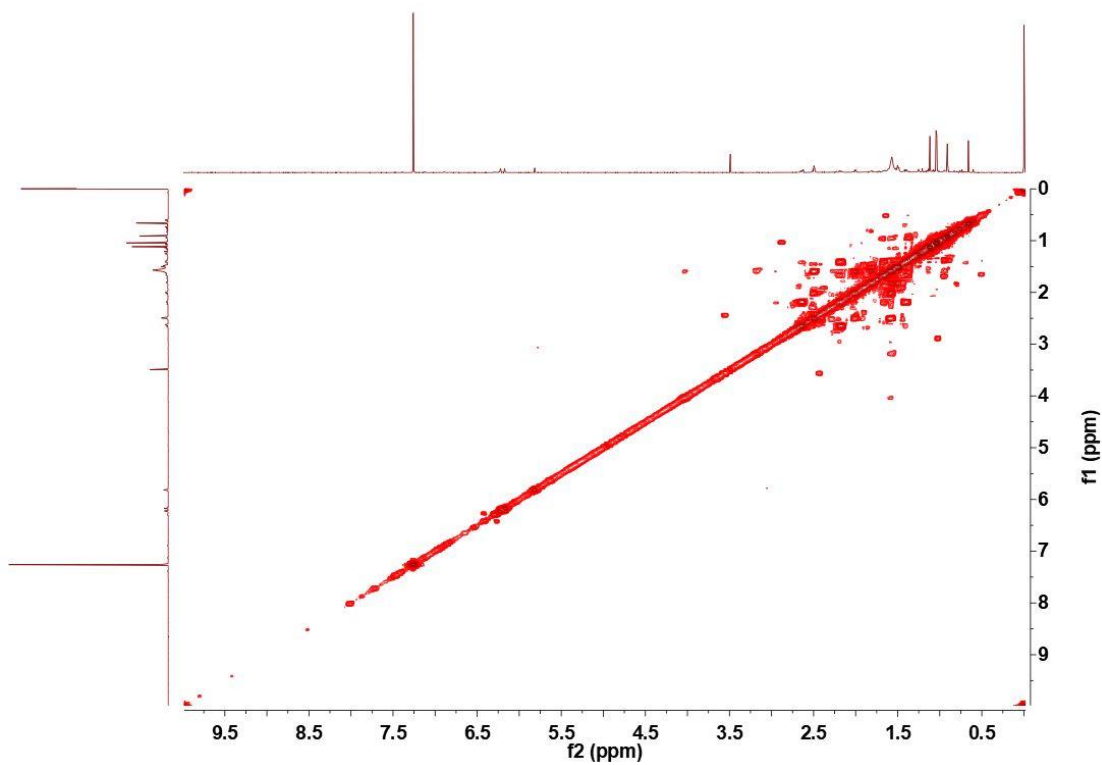

Figure S17.  $^1\text{H}$ - $^1\text{H}$  COSY spectrum of **3** in  $\text{CDCl}_3$ .

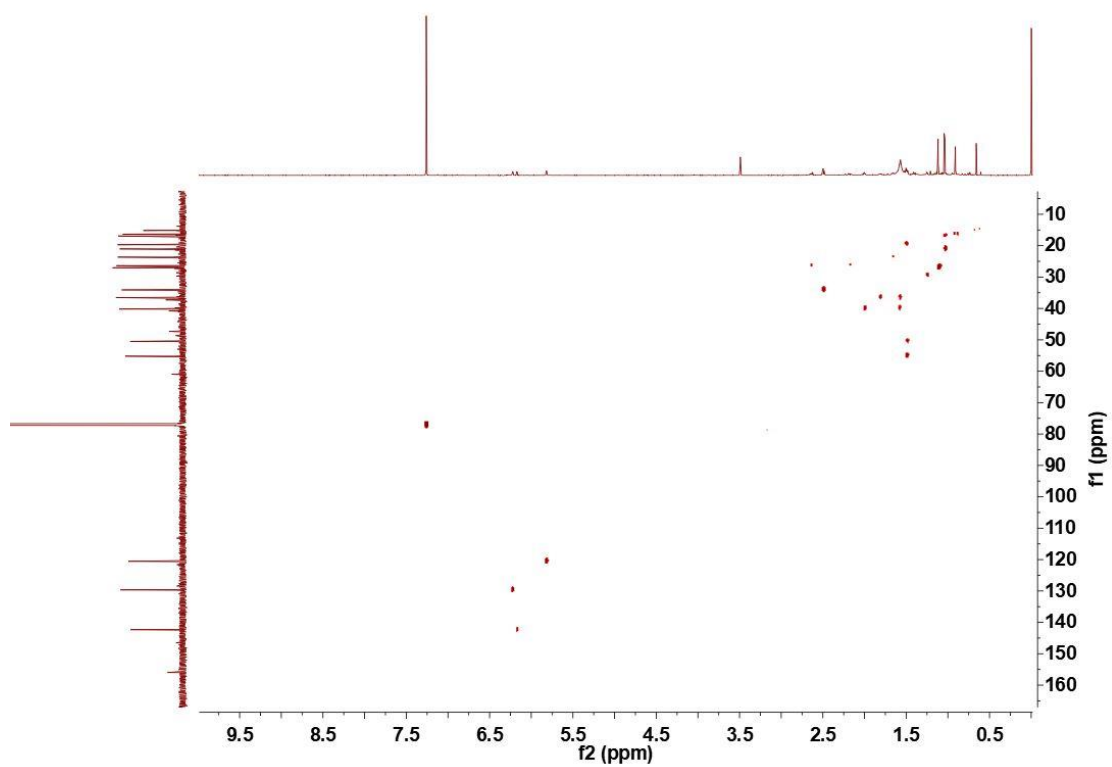

Figure S18. HSQC Spectrum of **3** in  $\text{CDCl}_3$ .

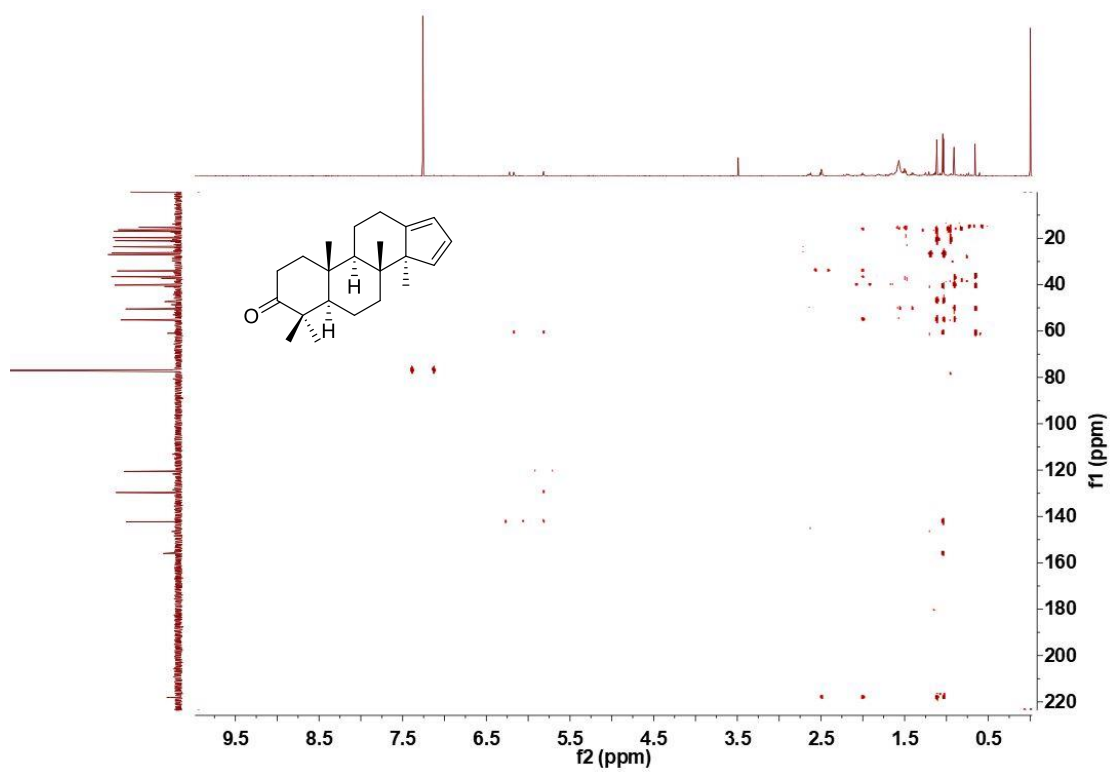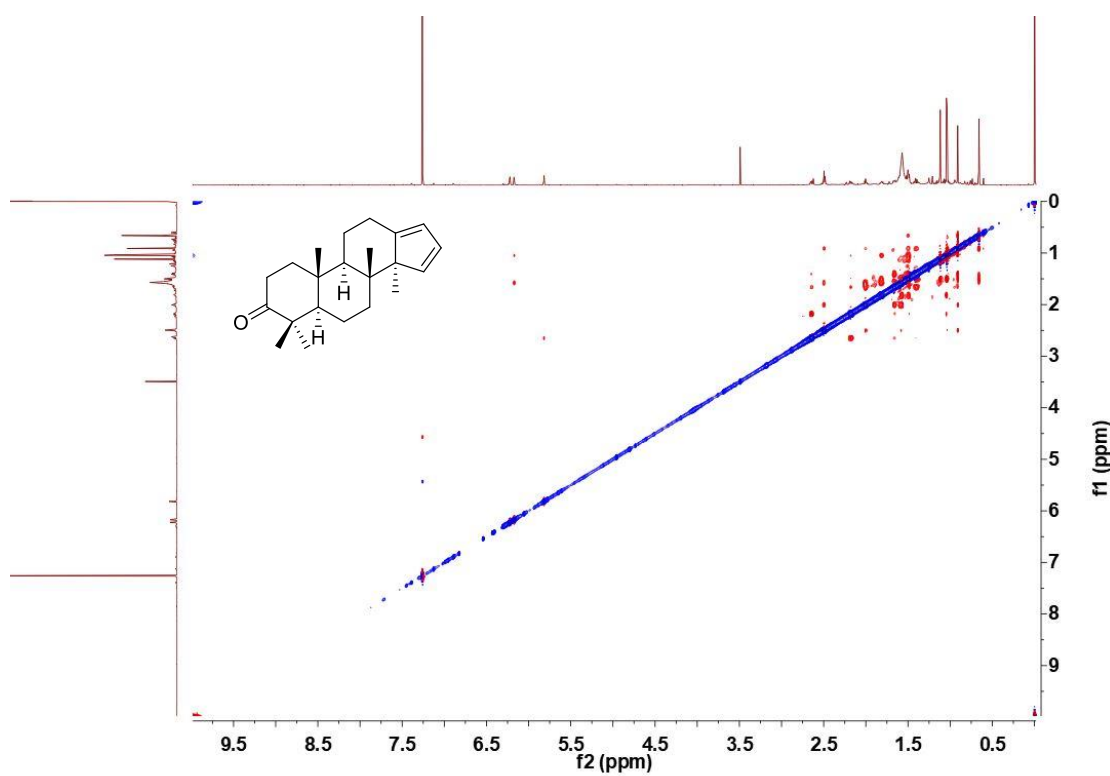

## Single Mass Analysis

Tolerance = 10.0 PPM / DBE: min = -10.0, max = 120.0

Selected filters: None

Monoisotopic Mass, Odd and Even Electron Ions

17 formula(e) evaluated with 1 results within limits (up to 51 closest results for each mass)

Elements Used:

C: 0-200 H: 0-400 O: 0-2

09/08/23 20-Sep-2017

Voltage EI+

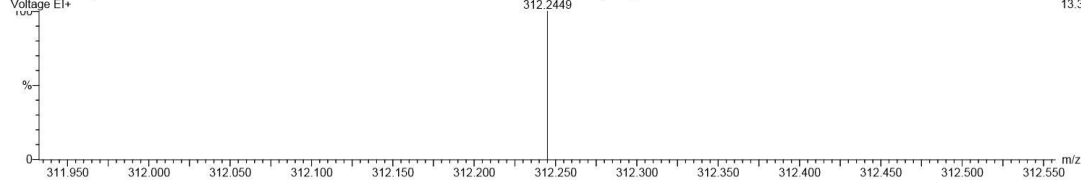

| Minimum: | 200.0      | 10.0 | -10.0 |     |           |           |
|----------|------------|------|-------|-----|-----------|-----------|
| Maximum: |            |      | 120.0 |     |           |           |
| Mass     | Calc. Mass | mDa  | PPM   | DBE | i-FIT     | Formula   |
| 312.2449 | 312.2453   | -0.4 | -1.3  | 7.0 | 5546026.5 | C22 H32 O |

Figure S21. HRESIMS of 3

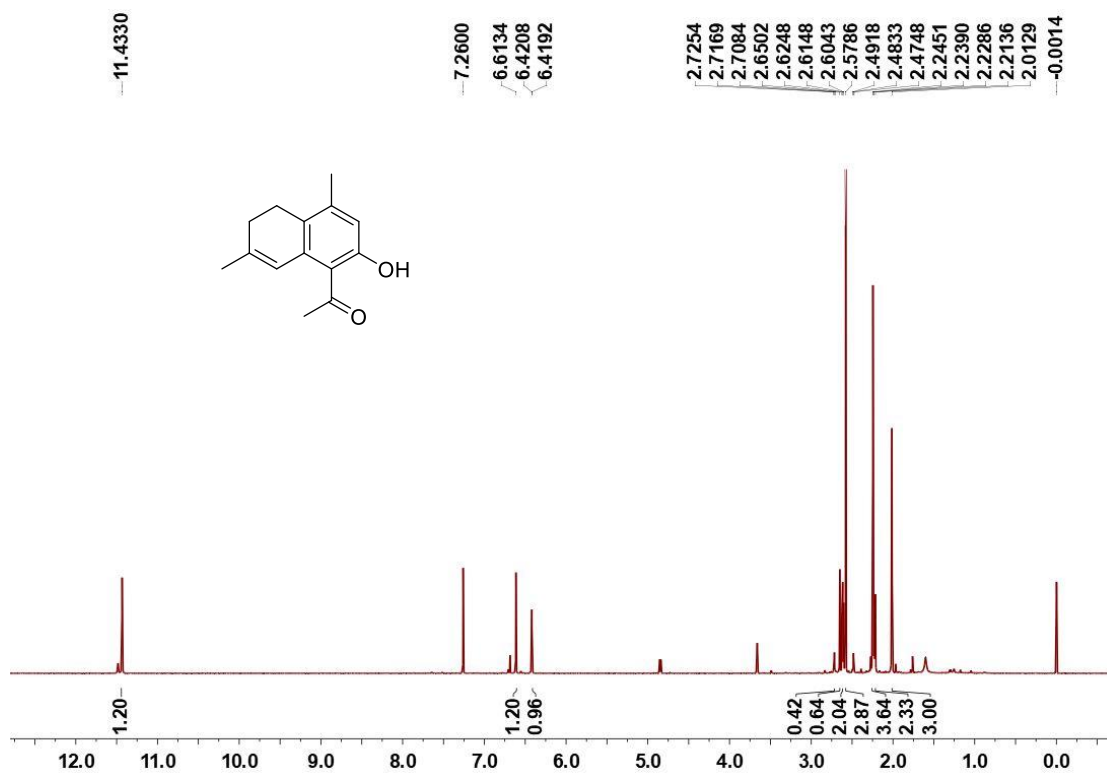Figure Figure S22. <sup>1</sup>H NMR spectrum of 4 in CDCl<sub>3</sub>.

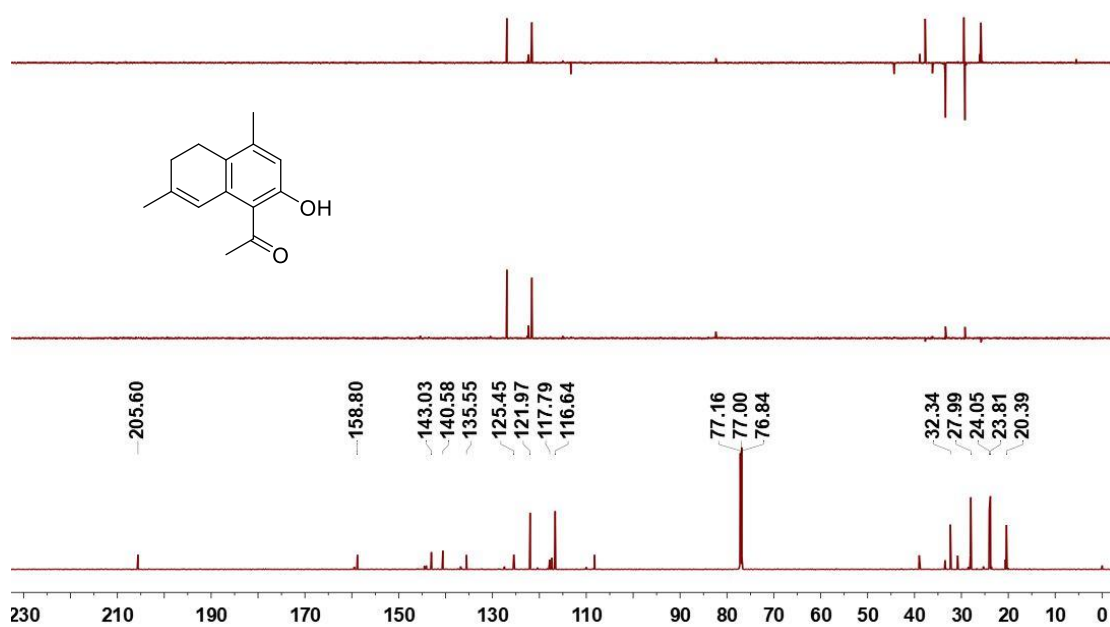

Figure S23.  $^{13}\text{C}$  NMR and DEPT spectra of 4 in  $\text{CDCl}_3$ .

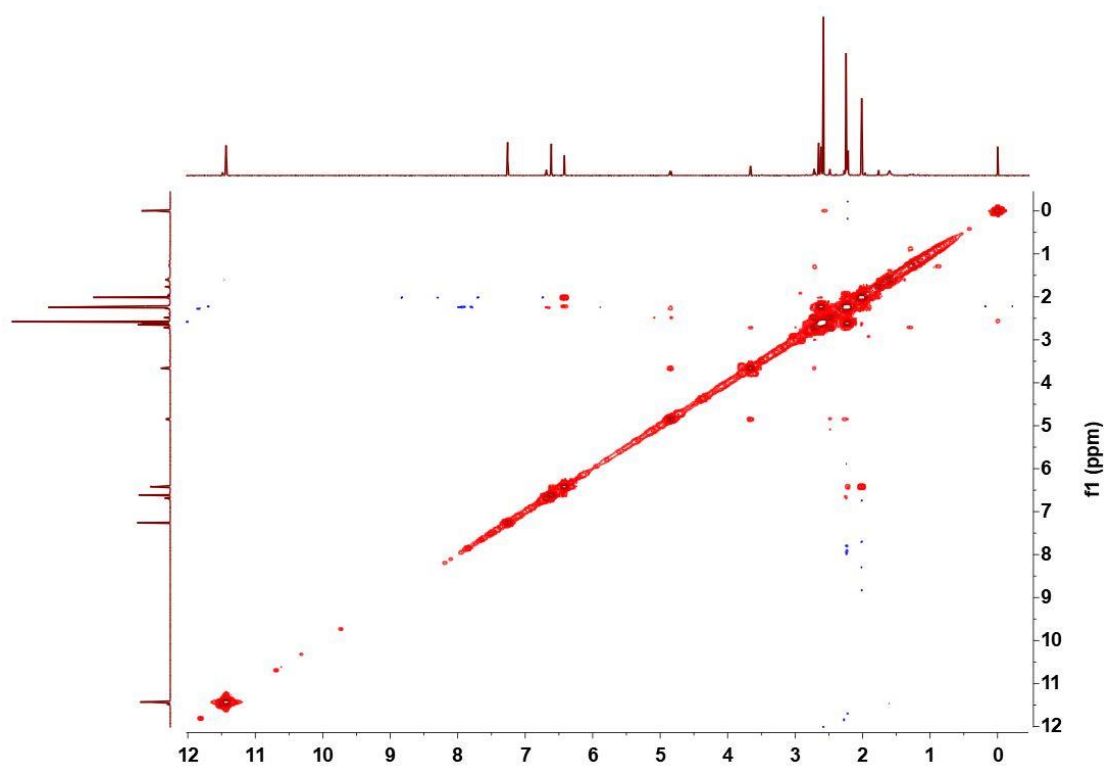

Figure S24.  $^1\text{H}$ - $^1\text{H}$  COSY spectrum of 4 in  $\text{CDCl}_3$ .

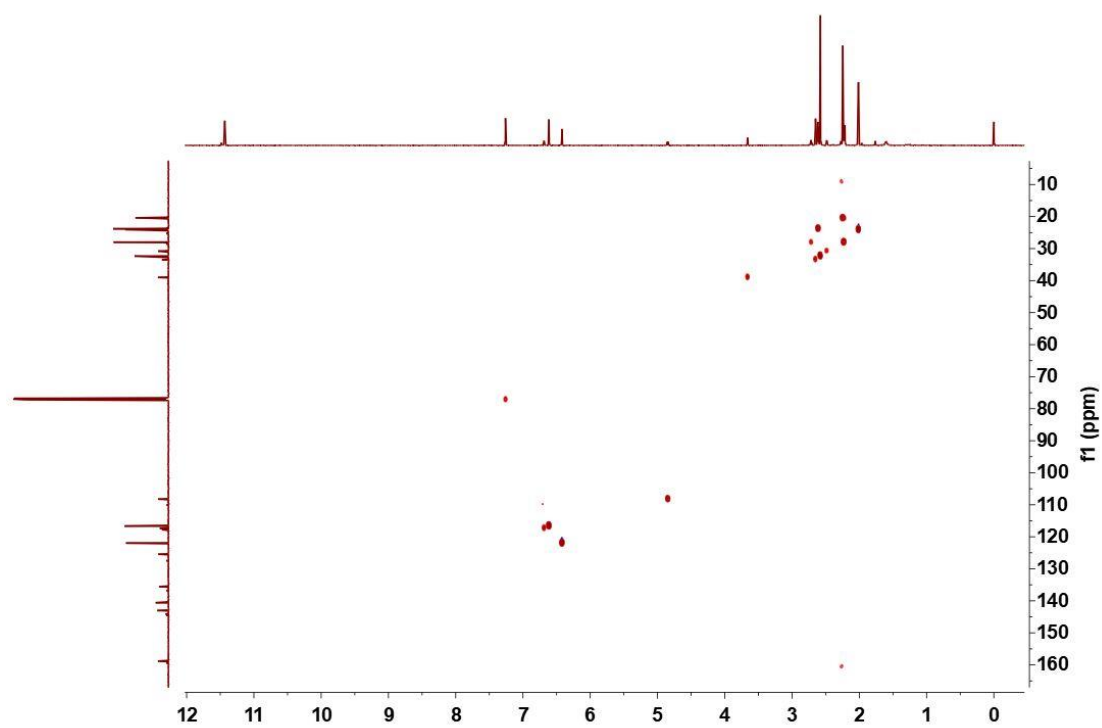

**Figure S25.** HSQC Spectrum of **4** in  $\text{CDCl}_3$ .

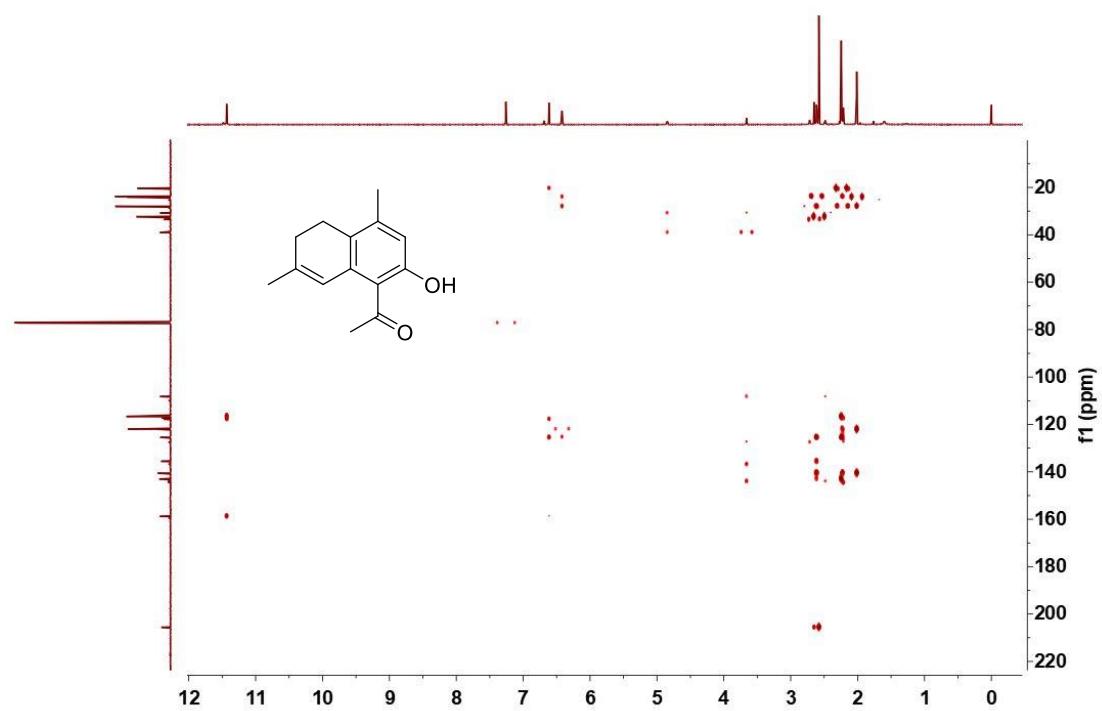

**Figure S26.** HMBC spectrum of **4** in  $\text{CDCl}_3$ .

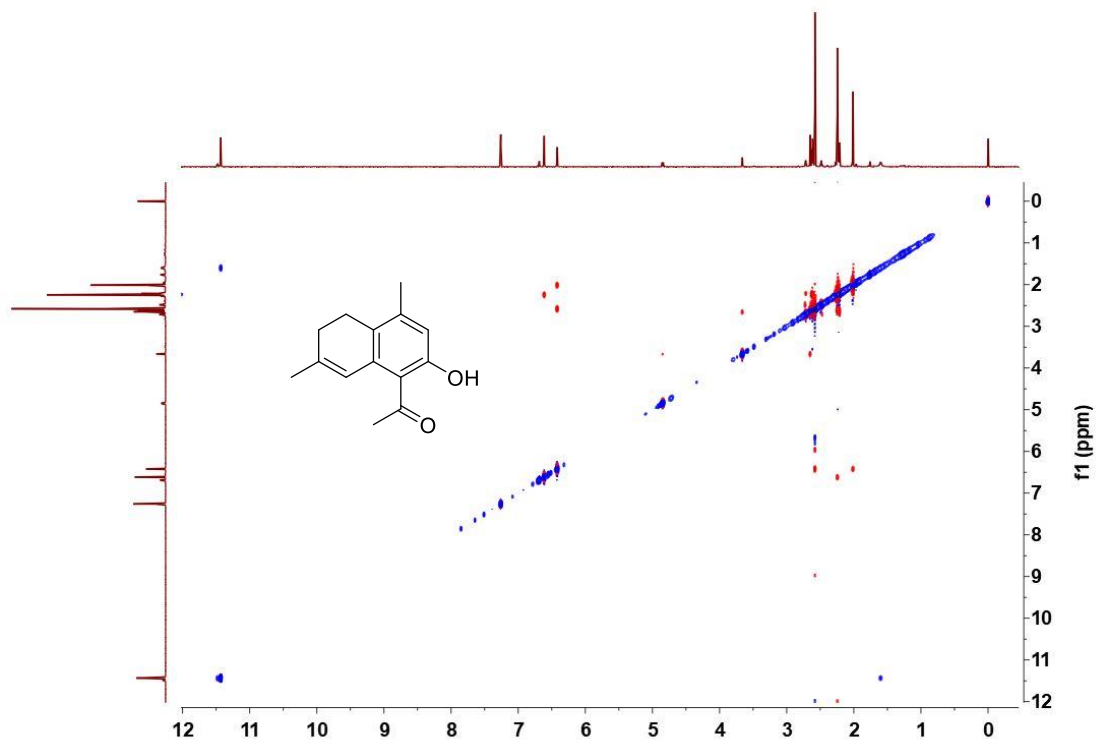

**Figure S27.** ROESY spectrum of **4** in CDCl<sub>3</sub>.



## Qualitative Analysis Report

|                        |              |               |                      |
|------------------------|--------------|---------------|----------------------|
| Data Filename          | qjw-31g.d    | Sample Name   | qjw-31g              |
| Sample Type            | Sample       | Position      | P1-A5                |
| Instrument Name        | Instrument 1 | User Name     |                      |
| Acq Method             | SIBU.m       | Acquired Time | 5/15/2017 4:37:48 PM |
| IRM Calibration Status | Success      | DA Method     | Default.m            |
| Comment                |              |               |                      |

|                |                             |       |
|----------------|-----------------------------|-------|
| Sample Group   |                             | Info. |
| Acquisition SW | 6200 series TOF/6500 series |       |
| Version        | Q-TOF B.05.01 (85125.2)     |       |

### User Spectra

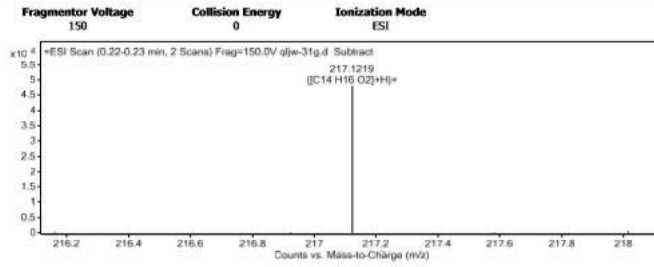

### Peak List

| m/z      | z | Abund    | Formula    | Ion    |
|----------|---|----------|------------|--------|
| 128.0384 | 2 | 21256.65 |            |        |
| 148.5519 | 2 | 7633.8   |            |        |
| 217.1219 | 1 | 47814.5  | C14 H16 O2 | (M+H)+ |
| 227.1063 |   | 7368.16  |            |        |
| 239.1041 | 1 | 40431.36 |            |        |
| 255.0699 | 1 | 7581.44  |            |        |
| 255.0965 |   | 7992.23  |            |        |
| 267.0987 | 1 | 10794.19 |            |        |

### Formula Calculator Element Limits

| Element | Min | Max |
|---------|-----|-----|
| C       | 3   | 60  |
| H       | 0   | 120 |
| O       | 0   | 30  |

### Formula Calculator Results

| Formula    | CalculatedMass | CalculatedMz | Mz       | Diff. (mDa) | Diff. (ppm) | DBE    |
|------------|----------------|--------------|----------|-------------|-------------|--------|
| C14 H16 O2 | 216.1150       | 217.1223     | 217.1219 | 0.3         | 1.4         | 7.0000 |

-- End Of Report --

**Figure S28.** HRESIMS of 4.
